# Supplementary material for: Mechanical Characterization of Thrombi Retrieved With Endovascular Thrombectomy in Patients With Acute Ischemic Stroke
Source: PubMed Central journal article supplement — Stroke. 2021 Jun 3;52(8):2510–7. doi: 10.1161/STROKEAHA.120.033527 (PMC8312567; doi:10.1161/strokeaha.120.033527), 2021-06-03

## SUPPLEMENTAL MATERIAL ON:

# Mechanical Characterization of Thrombi Retrieved with Endovascular Thrombectomy in Acute Ischemic Stroke

*Nikki Boodt<sup>1,2,3</sup>, MD; Philip R. W. Snouckaert van Schauburg<sup>1,4</sup>, MSc; Hajo M. Hund<sup>5</sup>, MD; Behrooz Fereidoonhad<sup>6</sup>, MSc, PhD; J. Patrick McGarry<sup>6</sup>, MSc, PhD; Ali C. Akyildiz, MSc, PhD<sup>4,7</sup>; Adriaan C. G. M. van Es<sup>1,8</sup>, MD, PhD; Simon F. De Meyer<sup>9</sup>, MSc, PhD; Diederik W.J. Dippe<sup>2</sup>, MD, PhD; Hester F. Lingsma<sup>3</sup>, MSc, PhD; Heleen M. M. van Beusekom<sup>10</sup>, MSc, PhD; Aad van der Lugt<sup>2</sup>, MD, PhD and Frank J. H. Gijzen<sup>4,7</sup>, MSc, PhD*

<sup>1</sup>Erasmus MC, University Medical Center Rotterdam, Department of Radiology and Nuclear Medicine, Rotterdam, the Netherlands

<sup>2</sup>Erasmus MC, University Medical Center Rotterdam, Department of Neurology, Rotterdam, the Netherlands

<sup>3</sup>Erasmus MC, University Medical Center Rotterdam, Department of Public Health, Rotterdam, the Netherlands

<sup>4</sup>Delft University of Technology, Department of Biomedical Engineering, Delft, the Netherlands

<sup>5</sup>Haaglanden Medical Center, Department of Radiology, The Hague, the Netherlands

<sup>6</sup>School of Engineering, National University of Ireland Galway, Galway, Ireland

<sup>7</sup>Erasmus MC, University Medical Center Rotterdam, Department of Biomedical Engineering, Rotterdam, the Netherlands

<sup>8</sup>Leiden University Medical Center, Department of Radiology, Leiden, the Netherlands

<sup>9</sup>KU Leuven Campus Kulak Kortrijk, Laboratory for Thrombosis Research, Kortrijk, Belgium

<sup>10</sup>Erasmus MC, University Medical Center Rotterdam, Department of Cardiology, Rotterdam, the Netherlands

## **Supplemental Methods: The Unconfined Compression Experiment**

The unconfined compression experiments were performed with the use of a custom-built force tester, consisting of an aluminium compression plate, attached to a 2,5N load cell (LSB200 Jr. Miniature S-beam load cell, Futek), which was vertically driven by a linear actuator (EACM4-E15-ZAMK, Oriental motor). The actuator was a stepper motor with a resolution of 0.01 mm, stroke length of 150 mm, and a maximal vertical thrust force of 200 N. The heated basin was controlled by a self-regulating temperature system.

**Table I.** Overview of retrieved and tested thrombi per patient. M1 and M2 indicate middle cerebral artery; ICA-T, internal carotid artery terminus and BA, basilar artery. \* indicates the thrombus was too small for mechanical characterization; \*\* indicates the thrombus was too soft for mechanical characterization.

| Patient | Occlusion Location | Pass | Retrieved Thrombi | Tested Thrombi |
|---------|--------------------|------|-------------------|----------------|
| 1       | M2                 | 1    | A*, B             | B              |
| 2       | M1                 | 1    | A                 | A              |
| 3       | M1                 | 1    | A*, B*            | -              |
| 4       | ICA-T              | 1    | -                 | -              |
|         |                    | 2    | A, B*, C          | A, C           |
|         |                    | 3    | -                 | -              |
|         |                    | 4    | A, B              | A, B           |
| 5       | M1                 | 1    | A, B              | A, B           |
|         |                    | 2    | A*                | -              |
|         |                    | 3    | A*                | -              |
|         |                    | 4    | A                 | A              |
| 6       | M1                 | 1    | A*, B             | B              |
| 7       | M1                 | 1    | -                 | -              |
|         |                    | 2    | A*, B, C          | B, C           |
| 8       | M1                 | 1    | A, B              | A, B           |
|         |                    | 2    | A                 | A              |
| 9       | M1                 | 1    | A, B              | A, B           |
|         |                    | 2    | -                 | -              |
|         |                    | 3    | A                 | A              |
|         |                    | 4    | -                 | -              |
|         |                    | 5    | A                 | A              |
| 10      | ICA-T              | 1    | -                 | -              |
|         |                    | 2    | A, B              | A, B           |
| 11      | M1                 | 1    | A, B              | A, B           |
| 12      | BA                 | 1    | A, B, C, D        | A, B, C, D     |
| 13      | M1                 | 1    | A, B              | A, B           |
| 14      | M2                 | 1    | A, B              | A, B           |
| 15      | M1                 | 1    | A                 | A              |
| 16      | BA                 | 1    | -                 | -              |
|         |                    | 2    | A*                | -              |
| 17      | M2                 | 1    | A                 | A              |
| 18      | M2                 | 1    | A**               | -              |
|         |                    | 2    | A                 | A              |
| 19      | M2                 | 1    | A, B              | A, B           |
| 20      | ICA-T              | 1    | A, B, C, D        | A, B, C, D     |
| 21      | M1                 | 1    | A*, B             | B              |

**Figure I:** Flow diagram of patient and thrombus selection.

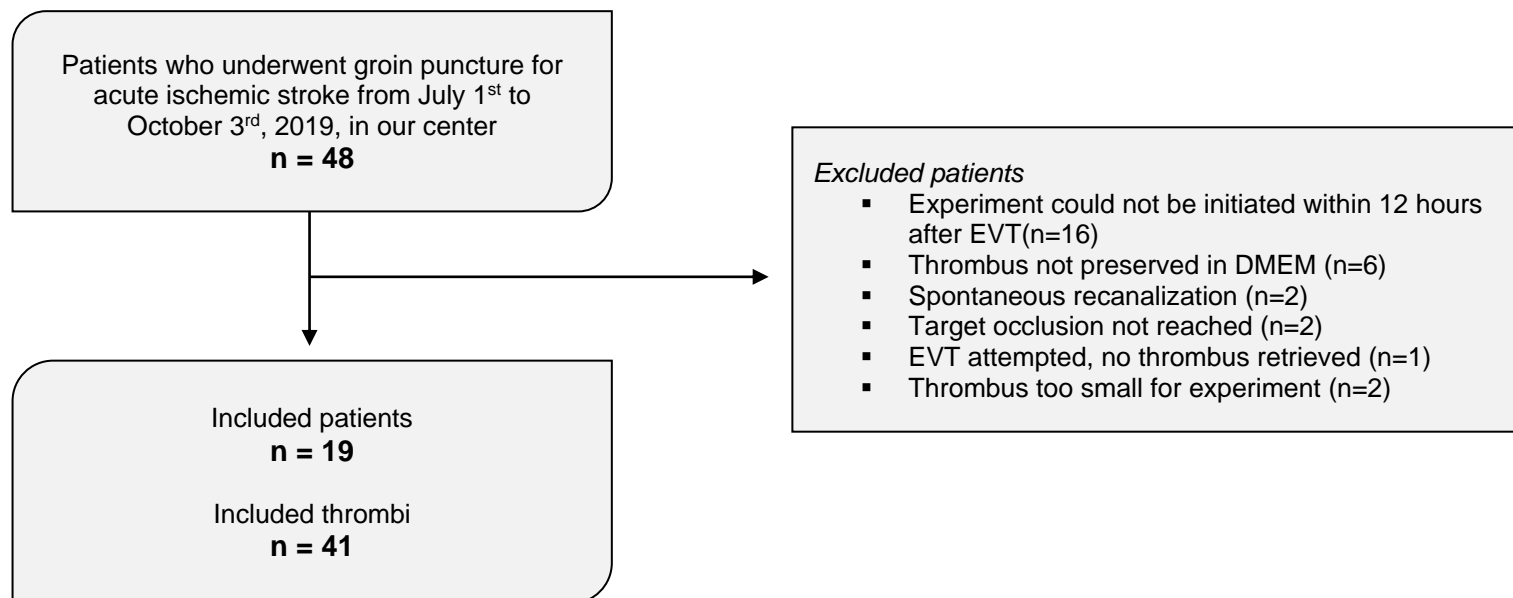

**Figure II:** Distribution of histological components of all included thrombi on H&E (A) and CD61 immunostaining (B).

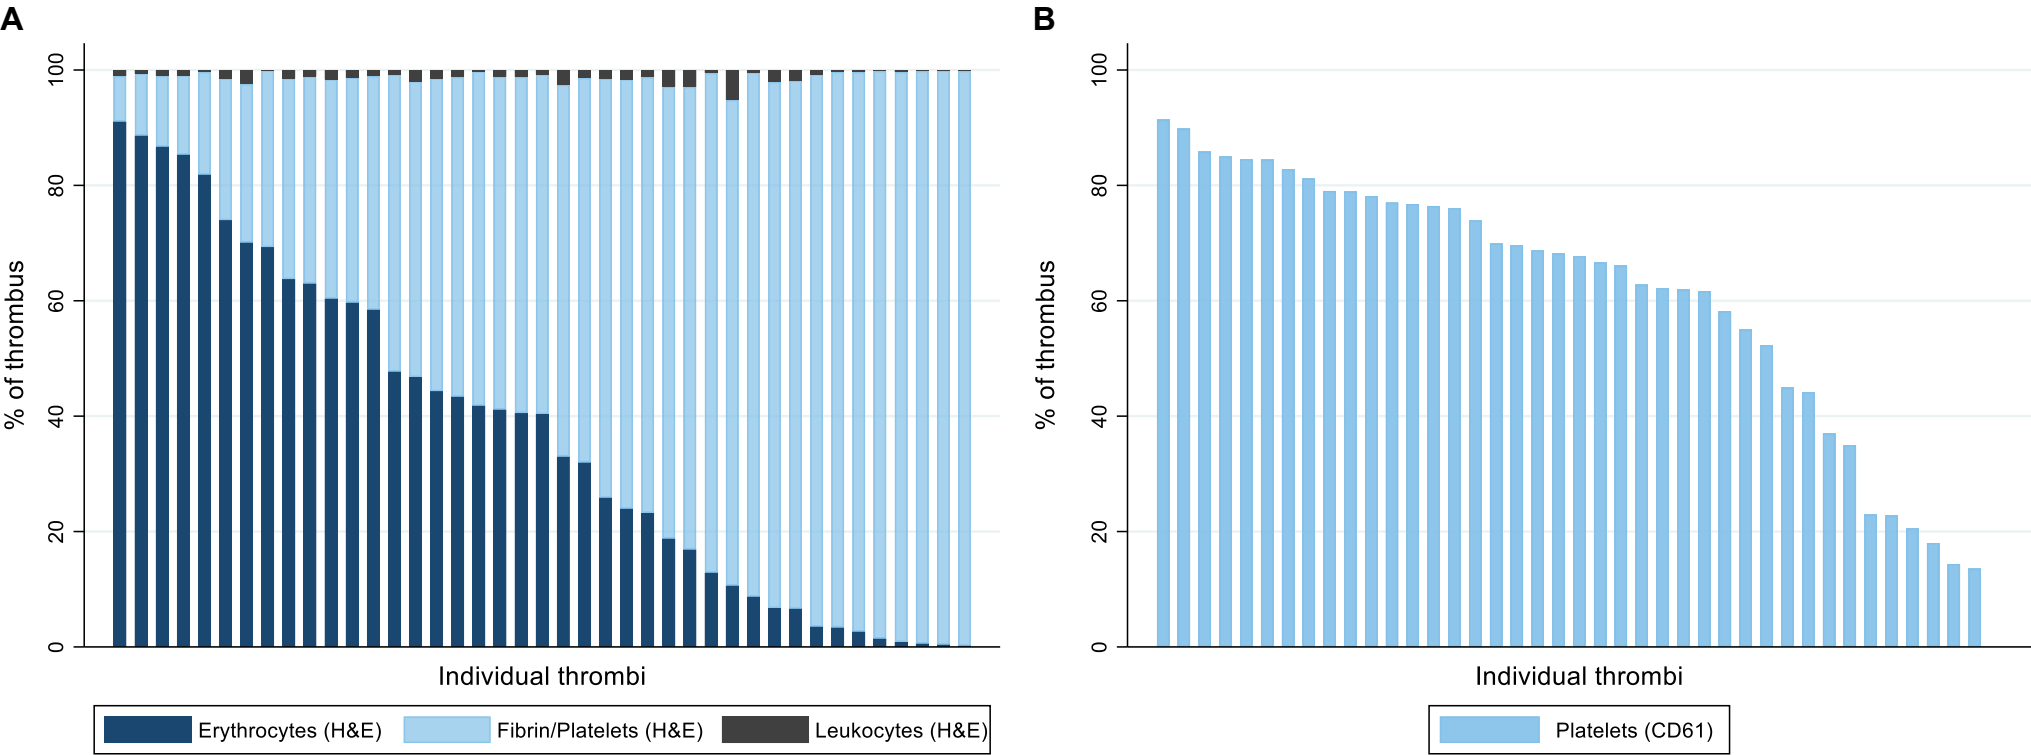

**Figure III:** Thrombus composition, stratified by pass number. Thrombi from later passes had higher fibrin/platelet content and lower erythrocyte content (not statistically significant).

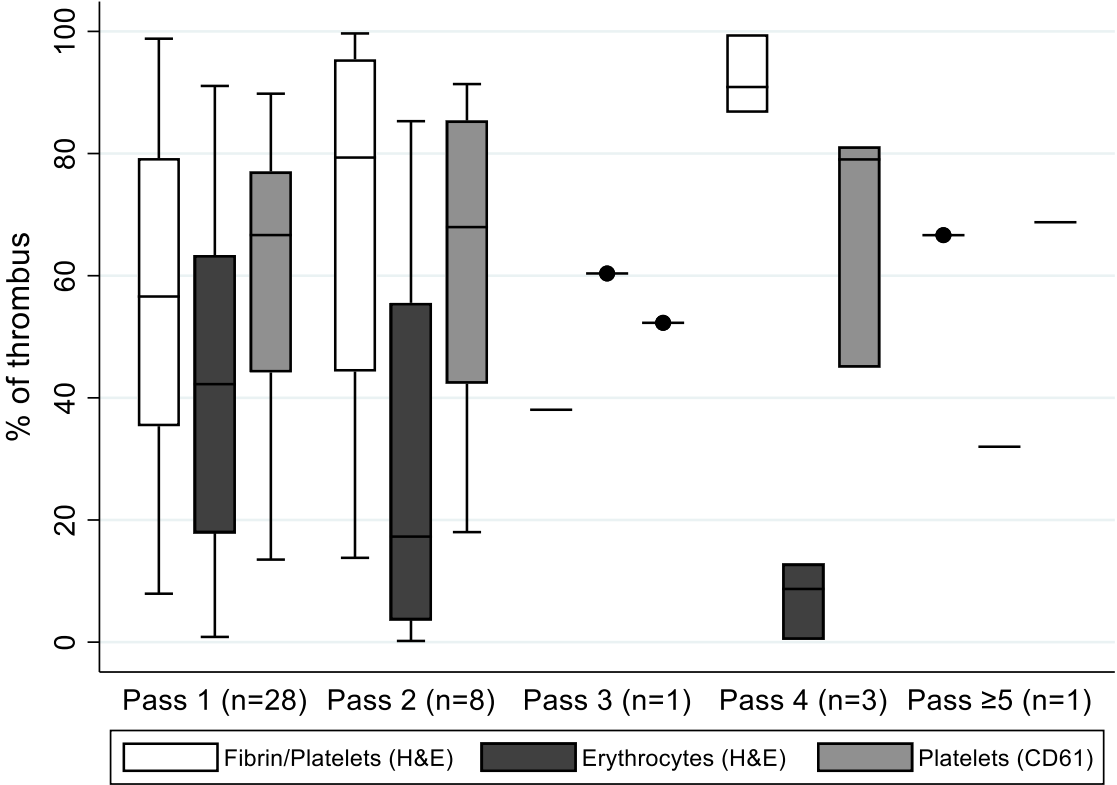

Supplement: str-52-2510-s001.pdf [file str-52-2510-s001.pdf]
